# Supplementary material for: Activation of C6 glioblastoma cell ceruloplasmin expression by neighboring human brain endothelia-derived interleukins in an in vitro blood–brain barrier model system
Source: PubMed Central journal article supplement (PMC4200123; doi:10.1186/s12964-014-0065-7), 2014-10-14
Supplement: 12964_2014_65_MOESM1_ESM.pdf [file 12964_2014_65_MOESM1_ESM.pdf]

## Additional Material

### Figure Legends

**Figure S1. Apical chamber serum has no effect on C6 glioma sCp transcript abundance.** qPCR of sCp transcript from total RNA collected from C6 glioma cells grown alone in serum-free media (C6) or grown alone in transwell with serum-free media in the basal chamber and media plus serum in the apical chamber (/-/C6). A paired t-test was used to determine the data are not significantly different. Data are represented as means  $\pm$  s.d. (n = 3, technical replicates).

**Figure S2. hBMVEC sCp transcript abundance is positively regulated by C6 glioma cells.** qPCR of hBMVEC sCp transcript from total RNA collected from hBMVEC grown either alone (EC) or distal to C6 glioma cells (EC-/C6). A paired t-test was used to determine the significance of the data. \*P < 0.05. Data are represented as means  $\pm$  s.d. (n = 3, technical replicates).

**Figure S3. Modulation of C6 glioma sCp transcript abundance by LPS requires hBMVEC.** Total RNA was isolated from C6 glioma cells seeded alone in transwell with or without the addition of LPS (100  $\mu$ g/mL) to the apical chamber for 24h. Soluble Cp transcript abundance was assessed via qPCR. One-way ANOVA statistical analysis was used to determine the significance of the data. Data are represented as means  $\pm$  s.d. (n = 3, technical replicates).

Figure S1

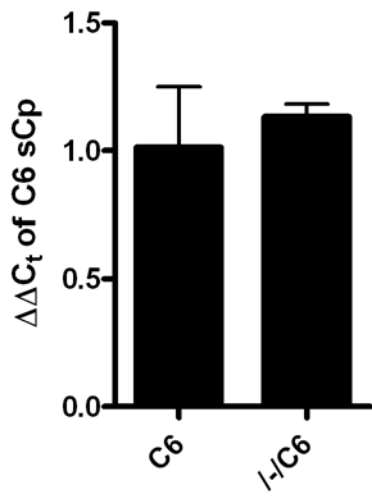

Figure S2

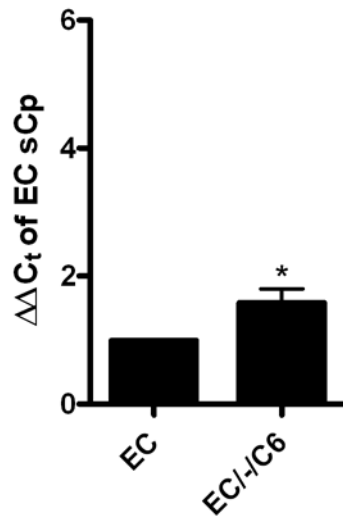

Figure S3

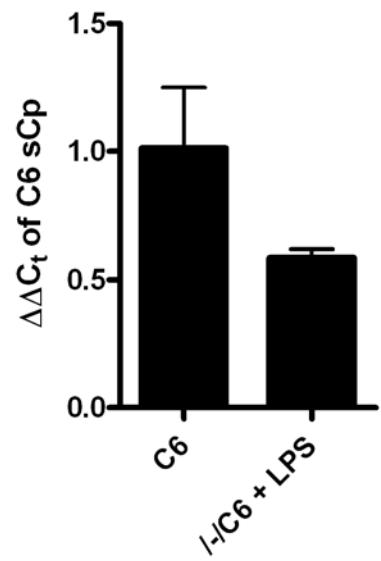

**Table S1. Primer list used for qPCR**

| Transcript              | Forward Primer        | Reverse Primer          |
|-------------------------|-----------------------|-------------------------|
| $\beta$ -actin          | GGGTCAGAAGGACTCCTACG  | GGTCTCAAACATGATCTGGG    |
| Rat sCp                 | TCCACTGCCATGTGACTGAC  | TCGGCATTACCAATTCCTCA    |
| Rat GPI-Cp              | GGTACTCCACTGCCATGTG   | GTGTATAGAGTATGTTCCAGG   |
| Isoform non-specific Cp | TGGTTTATCGTGAGTACACAG | TCTGCCCAAATGACAGGACC    |
| Human IL-1 $\beta$      | TCACTTAAAGCCCGCCTGAC  | GGAAGCGGTTGCTCATCAGA    |
| Human IL-6              | CCACCGGGAACGAAAGAGAA  | GAGAAGGCAACTGGACCGAA    |
| Human sCp               | TCCCTGGAACATACCAAACC  | CCAATTTATTTTCATTCAGCCGA |

Except where indicated primer pairs are species non-specific (rat/human)
